# Supplementary material for: Reduced Graphene Oxide Aerogels Cartridges for Solid Phase Extraction of Benzotriazoles
Source: MDPI journal article supplement (doi:10.3390/ma16062519), 2023-03-22
Supplement: s1 [file s1]

# Reduced Graphene Oxide Aerogels Cartridges for Solid Phase Extraction of Benzotriazoles

Samantha L. Flores-López <sup>1</sup>, Ana Arenillas <sup>1</sup>, Ivan Mikšík <sup>2</sup>, J. Angel Menéndez <sup>1</sup>  
and Miguel A. Montes-Morán <sup>1,\*</sup>

<sup>1</sup> Instituto de Ciencia y Tecnología del Carbono, INCAR-CSIC, Francisco Pintado Fe,  
26, 33011 Oviedo, Spain

<sup>2</sup> Institute of Physiology, The Czech Academy of Sciences,  
142 20 Prague, Czech Republic

## Supplementary Material

**Table S1.** Analytical features of the proposed HPLC method for the quantitative analysis of UV-benzotriazoles dissolved in the best extraction solvent (THF).

| Analyte | Range<br>(ng mL <sup>-1</sup> ) | Equation                                       | R <sup>2</sup> | LOQ <sup>b</sup><br>(ng mL <sup>-1</sup> ) | LOD <sup>a</sup><br>(ng mL <sup>-1</sup> ) |
|---------|---------------------------------|------------------------------------------------|----------------|--------------------------------------------|--------------------------------------------|
| UVP     | 25-4000                         | $y = 1.45 \cdot 10^{-6}x^2 + 0.0424x - 1.2644$ | 0.9990         | 2.23                                       | 1.1                                        |
| UV329   | 25-4000                         | $y = 1.16 \cdot 10^{-6}x^2 + 0.0256x - 0.0503$ | 0.9998         | 2.44                                       | 0.95                                       |
| UV234   | 25-4000                         | $y = 7.63 \cdot 10^{-7}x^2 + 0.0201x + 0.0405$ | 0.9992         | 2.13                                       | 0.82                                       |

<sup>a</sup> Limit of detection. <sup>b</sup> Limit of quantification

**Table S2.** Properties of the UV-benzotriazoles used in this study.

| Benzotriazole | Molecule                                                                           | Molecular Weight | Log K <sub>ow</sub> |
|---------------|------------------------------------------------------------------------------------|------------------|---------------------|
| UVP           | 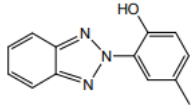  | 225.2            | 4.33                |
| UV329         |   | 323.4            | 6.21                |
| UV234         |  | 447.57           | 7.67                |

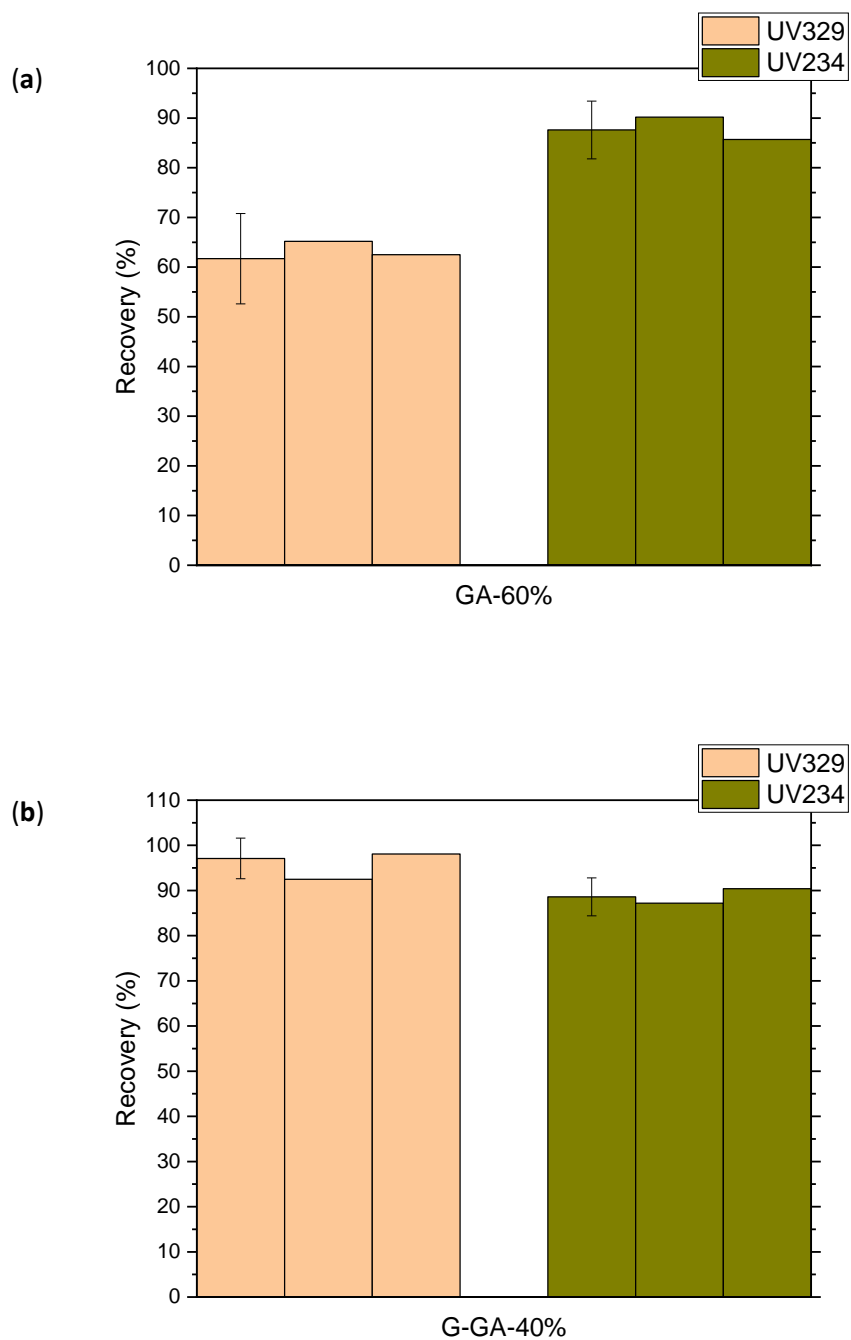

**Figure S1.** Recovery values of (a) GA-60% and (b) G-GA-40% cartridges after three consecutive reuses (see Experimental Section 2.3 for details).

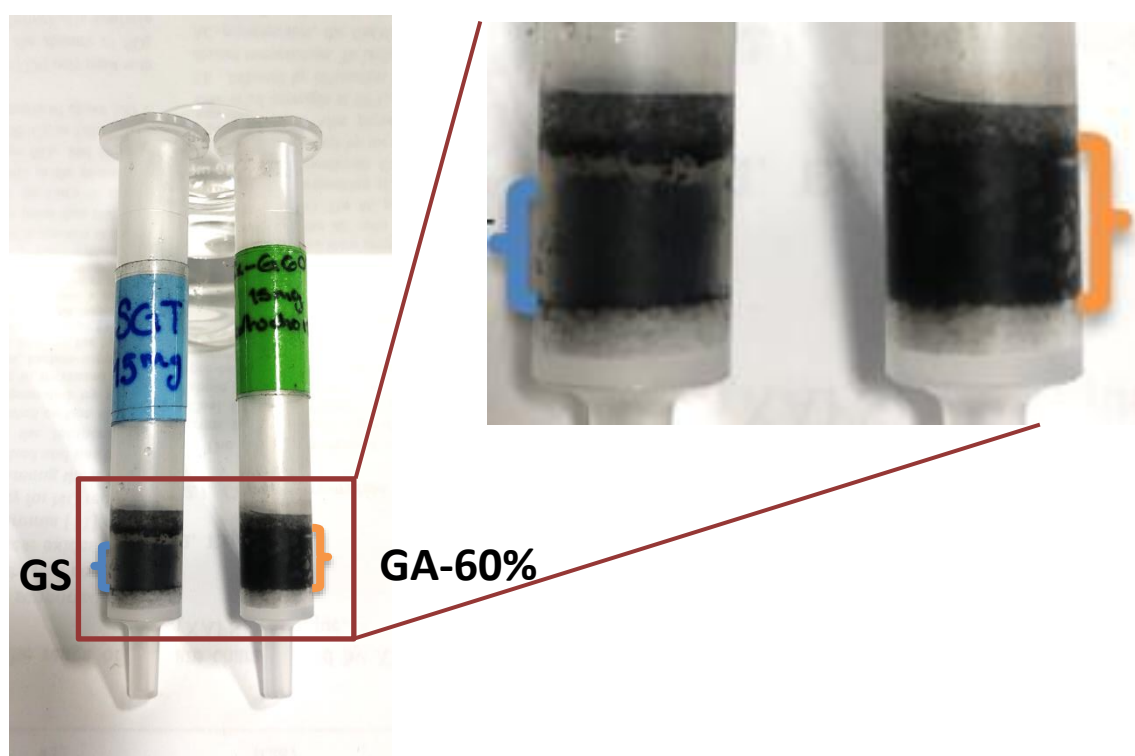

**Figure S2.** Physical aspect of GS and GA-60% SPE cartridges after loading and elution of samples. The GS sample is irreversibly compacted after use whereas the GA-60% preserves the mechanical integrity.
